# Supplementary material for: MIL-88-Derived N and S Co-Doped Carbon Materials with Supplemental FeSx to Enhance the Oxygen Reduction Reaction Performance
Source: MDPI journal article supplement (doi:10.3390/catal12080806), 2022-07-22
Supplement: s1 [file s1]

# MIL-88-Derived N and S Co-Doped Carbon Materials with Supplemental FeS<sub>x</sub> to Enhance the Oxygen Reduction Reaction Performance

Yu Liu <sup>1,2,†</sup>, Yinghao Xu <sup>2,3,†</sup>, He Wang <sup>2,3</sup>, Jia Zhang <sup>4</sup>, Haiyan Zhao <sup>5</sup>, Li Chen <sup>6</sup>, Ling Xu <sup>1,\*</sup>, Yan Xie <sup>2,\*</sup> and Jiahui Huang <sup>2</sup>

<sup>1</sup> College of Chemistry and Materials Science, Inner Mongolia Minzu University, Inner Mongolia, Tongliao 028000, China; yuliu@dicp.ac.cn

<sup>2</sup> Dalian National Laboratory for Clean Energy, Dalian Institute of Chemical Physics, Chinese Academy of Sciences, Zhongshan Road 457, Dalian 116023, China; yinghao.xu@uzh.ch (Y.X.); hw122@ic.ac.uk (H.W.); jiahuihuang@dicp.ac.cn (J.H.)

<sup>3</sup> Dalian Leicester Institute, Dalian University of Technology, Dalian 116024, China

<sup>4</sup> State Key Laboratory of Catalysis, Dalian Institute of Chemical Physics, Chinese Academy of Sciences, Zhongshan Road 457, Dalian 116023, China; zhangjia610@dicp.ac.cn

<sup>5</sup> Liaoning Key Laboratory of Plasma Technology, School of Physics and Materials Engineering, Dalian Minzu University, Liaoning, Dalian 116600, China; zhaohaiyan@dlmu.edu.cn

<sup>6</sup> Shanghai Key Laboratory of Green Chemistry and Chemical Processes, School of Chemistry and Molecular Engineering, East China Normal University, Shanghai 200062, China; chenli@chem.ecnu.edu.cn

\* Correspondence: tlxuling1979@163.com (L.X.); yanxie@dicp.ac.cn (Y.X.)

† These authors contributed equally to this work.

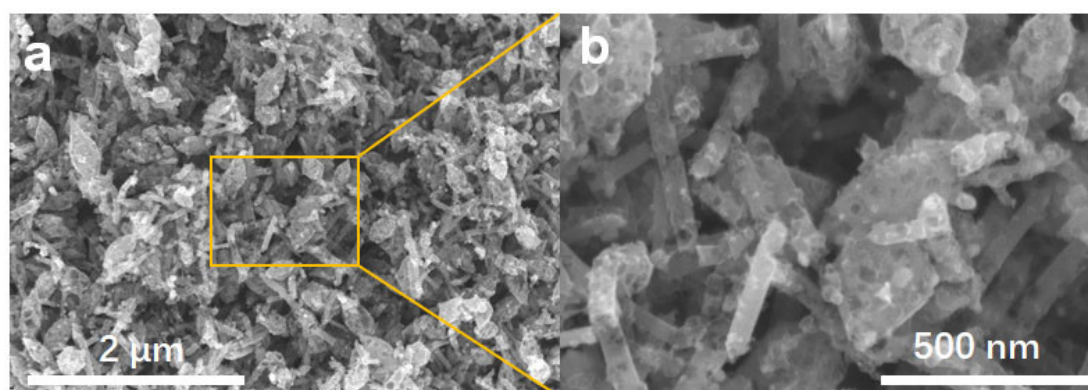

Figure S1. SEM images of (a) and (b) MIL-88-850.

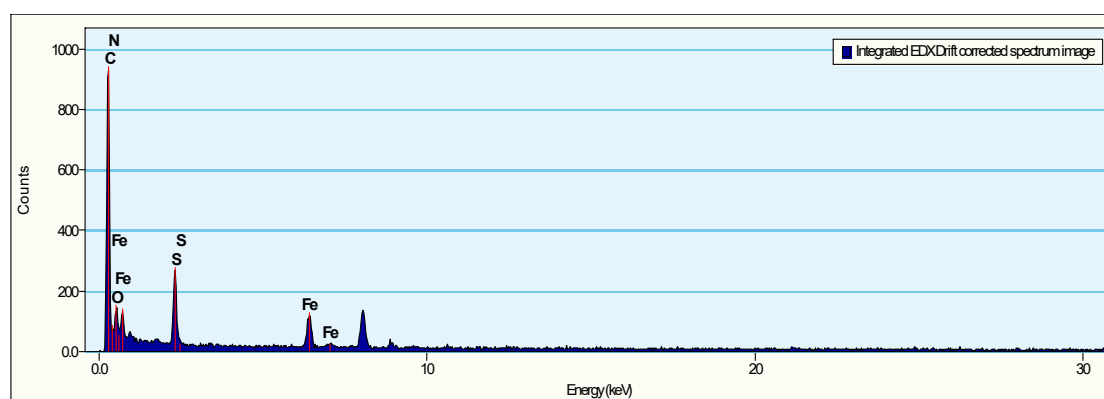

Figure S2. EDX of FeNSC-850.

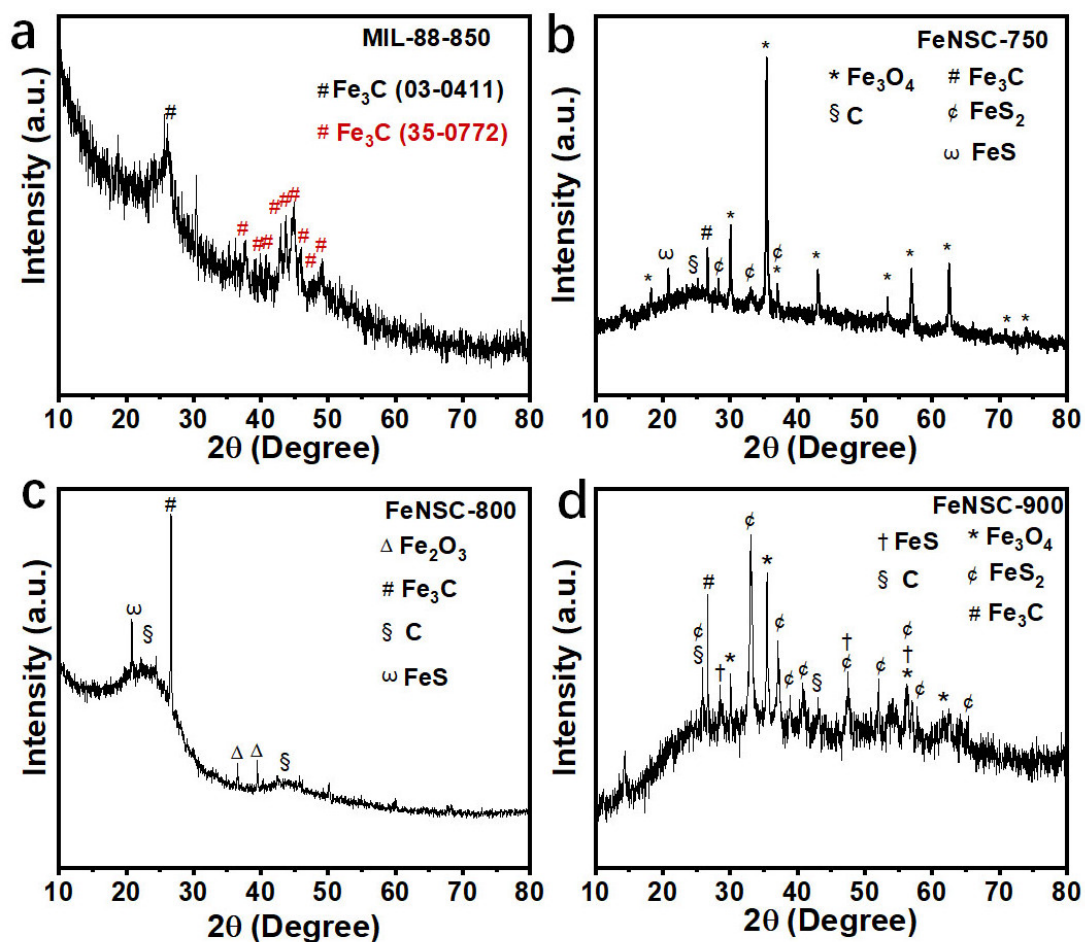

Figure S3. XRD patterns of (a) MIL-88-850, (b) FeNSC-750, (c) FeNSC-800 and (d) FeNSC-900.

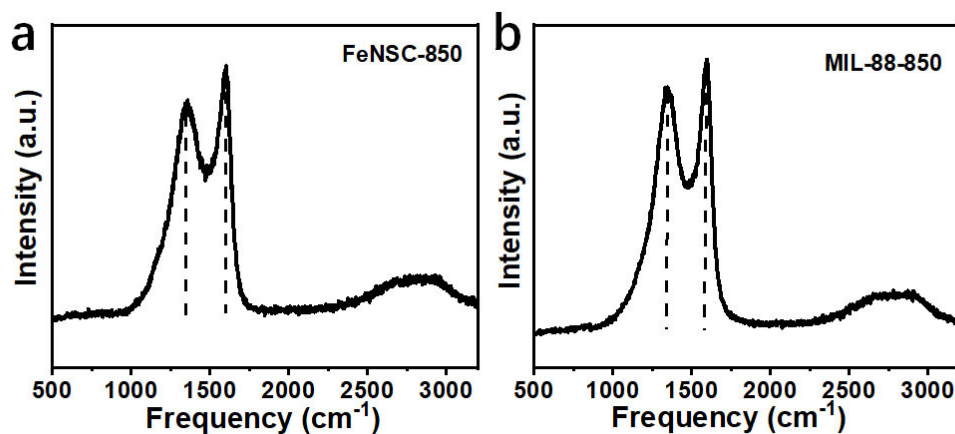

Figure S4. Raman spectra of (a) FeNSC-850 and (b) MIL-88-850.

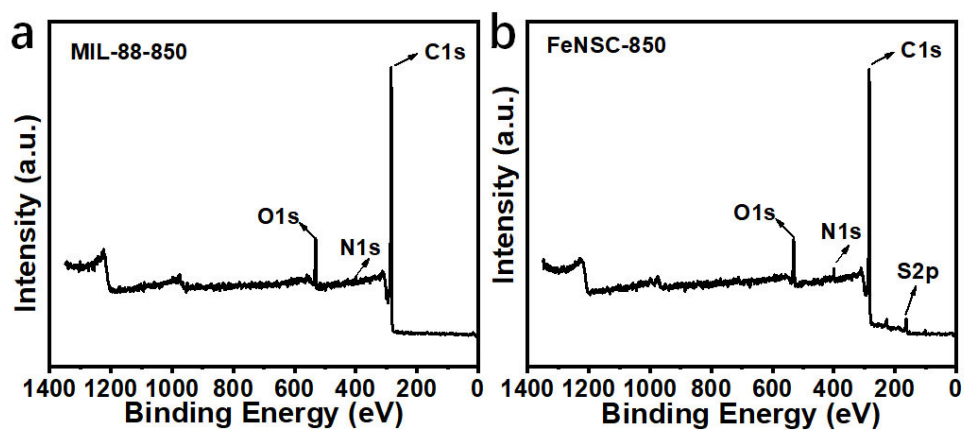

Figure S5. The survey spectra of (a) MIL-88-850 and (b) FeNSC-850.

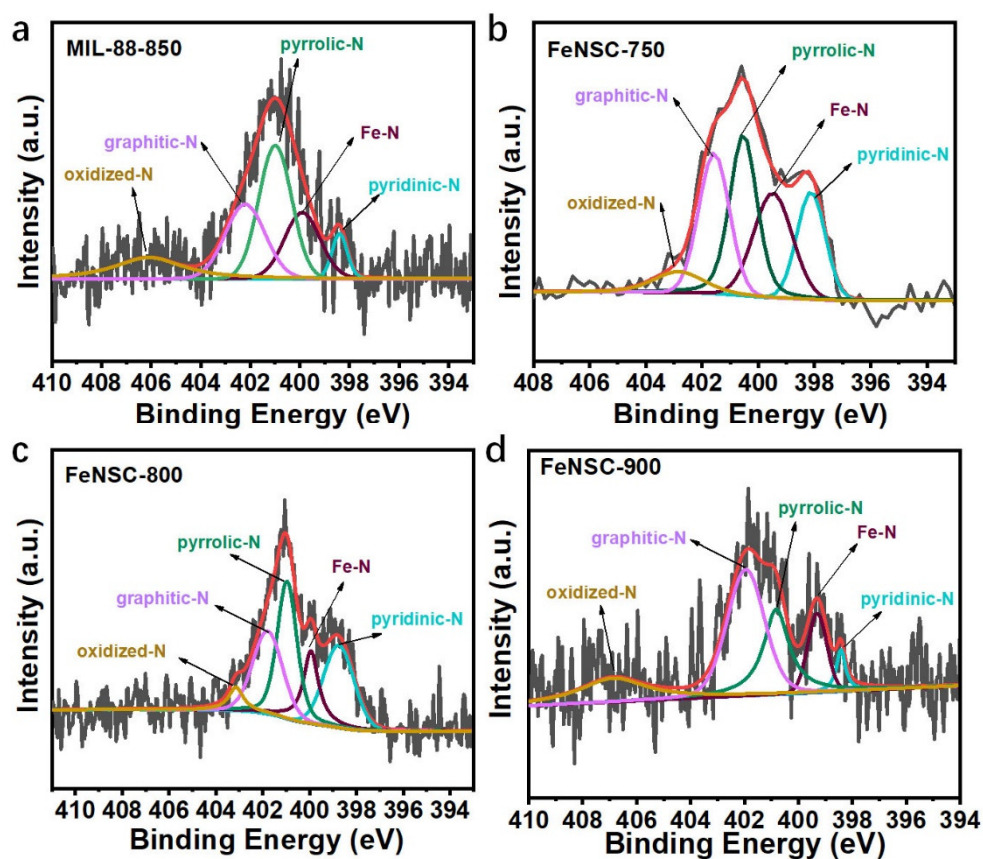

Figure S6. N 1s XPS spectra of (a) MIL-88-850, (b) FeNSC-750, (c) FeNSC-800 and (d) FeNSC-900.
